# Supplementary material for: Dynamic changes in the gel properties, microbial community, and volatile flavor profile of Spanish mackerel ( Scomberomorus niphonius ) sausages inoculated with Lactiplantibacillus plantarum CY1-2
Source: Royal Society of Chemistry journal article supplement (doi:10.1039/d4fo03841j), 2024-01-01
Supplement: d4fo03841j1.pdf [file d4fo03841j1.pdf]

Table S1 Changes in flavor compounds in the sausage inoculated with *L. plantarum* CY1-2 during fermentation

| Compounds                               | Relative Content (µg/100g) |       |      |       |       |       |
|-----------------------------------------|----------------------------|-------|------|-------|-------|-------|
|                                         | 0 h                        | 8 h   | 16 h | 24 h  | 32 h  | 40 h  |
| Aldehydes                               |                            |       |      |       |       |       |
| Octanal                                 | 0.59                       | 10.96 | —    | 5.70  | 50.63 | 65.91 |
| Nonanal                                 | 0.61                       | 15.80 | 0.51 | 24.70 | 11.58 | 23.07 |
| Syringaldehyde                          | —                          | 4.77  | 0.14 | —     | 2.92  | 4.89  |
| Benzaldehyde                            | —                          | 1.20  | —    | —     | —     | —     |
| Phenylpropionaldehyde                   | —                          | —     | —    | —     | —     | 7.17  |
| Heptanal                                | —                          | —     | —    | —     | —     | 92.15 |
| Hexanal                                 | —                          | —     | —    | —     | 19.48 | 87.56 |
| 9,12,15-Octadecatrienal                 | —                          | —     | 1.78 | 97.17 | 8.03  | 16.66 |
| <i>(E, Z, Z)</i> -trideca-2,4,7-trienal | —                          | —     | —    | 3.92  | 14.10 | 1.34  |
| Alcohols                                |                            |       |      |       |       |       |
| 2-Hepten-1-ol, (Z)-                     | 1.23                       | —     | —    | —     | —     | 21.78 |
| Pentanol                                | 1.23                       | 1.14  | —    | —     | —     | —     |
| 1-Penten-3-ol                           | —                          | 23.03 | —    | —     | —     | —     |
| 1-Octen-3-ol                            | —                          | 16.66 | 0.66 | 82.96 | 25.36 | 56.85 |
| 2-Octen-1-ol                            | —                          | 10.96 | —    | 71.07 | —     | —     |
| 2-Hepten-1-ol, (E)-                     | —                          | —     | 4.66 | 16.72 | —     | —     |
| 2-Octyn-1-ol                            | —                          | —     | —    | —     | 22.53 | 1.97  |
| Alkanes                                 |                            |       |      |       |       |       |
| Cedrene                                 | —                          | 3.25  | —    | —     | —     | —     |
| Longipinene                             | —                          | 2.74  | 0.16 | —     | —     | —     |
| Decane                                  | —                          | 13.72 | —    | 65.03 | 19.89 | 26.90 |
| Heptadecane                             | —                          | 2.60  | 0.19 | —     | —     | 3.22  |
| Eicosane                                | —                          | 17.68 | —    | —     | 17.59 | —     |
| Tetradecane                             | —                          | 0.84  | —    | —     | —     | —     |
| Dodecane                                | —                          | 6.74  | 0.14 | —     | 5.38  | 8.54  |

|                                  |      |       |      |        |       |       |
|----------------------------------|------|-------|------|--------|-------|-------|
| Pentadecane                      | 0.50 | 26.66 | 8.96 | —      | 24.03 | 30.08 |
| Hexadecene                       | —    | —     | —    | 59.61  | —     | 21.03 |
| Ketones                          |      |       |      |        |       |       |
| 2-Hydroxy acetophenone           | —    | —     | —    | 5.38   | —     | —     |
| 2-Undecanone                     | —    | —     | 1.84 | —      | 3.14  | 5.22  |
| Acids                            |      |       |      |        |       |       |
| Hydroxyacetic acid               | 0.70 | 28.37 | —    | 257.72 | 7.36  | 63.37 |
| Benzoic acid                     | —    | 2.03  | 0.13 | —      | —     | —     |
| Acetic acid                      | —    | 0.63  | —    | —      | —     | —     |
| Pterin-6-carboxylic acid         | —    | —     | —    | —      | 0.67  | 1.11  |
| Esters                           |      |       |      |        |       |       |
| Arachidonic acid methyl          | —    | —     | —    | —      | —     | 1.40  |
| Methyl p-tert-butylphenylacetate | —    | —     | —    | —      | —     | 1.13  |
| Isobutyl acetate                 | —    | —     | 0.93 | —      | —     | —     |
| Isoamyl acetate                  | —    | 4.24  | 0.11 | 44.26  | 9.32  | 10.57 |
| Ethyl stearate                   | —    | 4.25  | 0.28 | —      | —     | —     |

---

Note: Compound was not detected in the sausage inoculated *L. plantarum* CY1-2
